# Supplementary material for: Artificial intelligence empowered integration of Palmitoylation and NK cells signatures in diagnostic and therapeutic repurposing framework identification for diabetic nephropathy patients
Source: Research Square preprint supplement (doi:10.21203/rs.3.rs-8750903/v1), 2026-02-09
Supplement: Supplementary file 1 [file 206ae9fa956c6e2818feade2.docx]

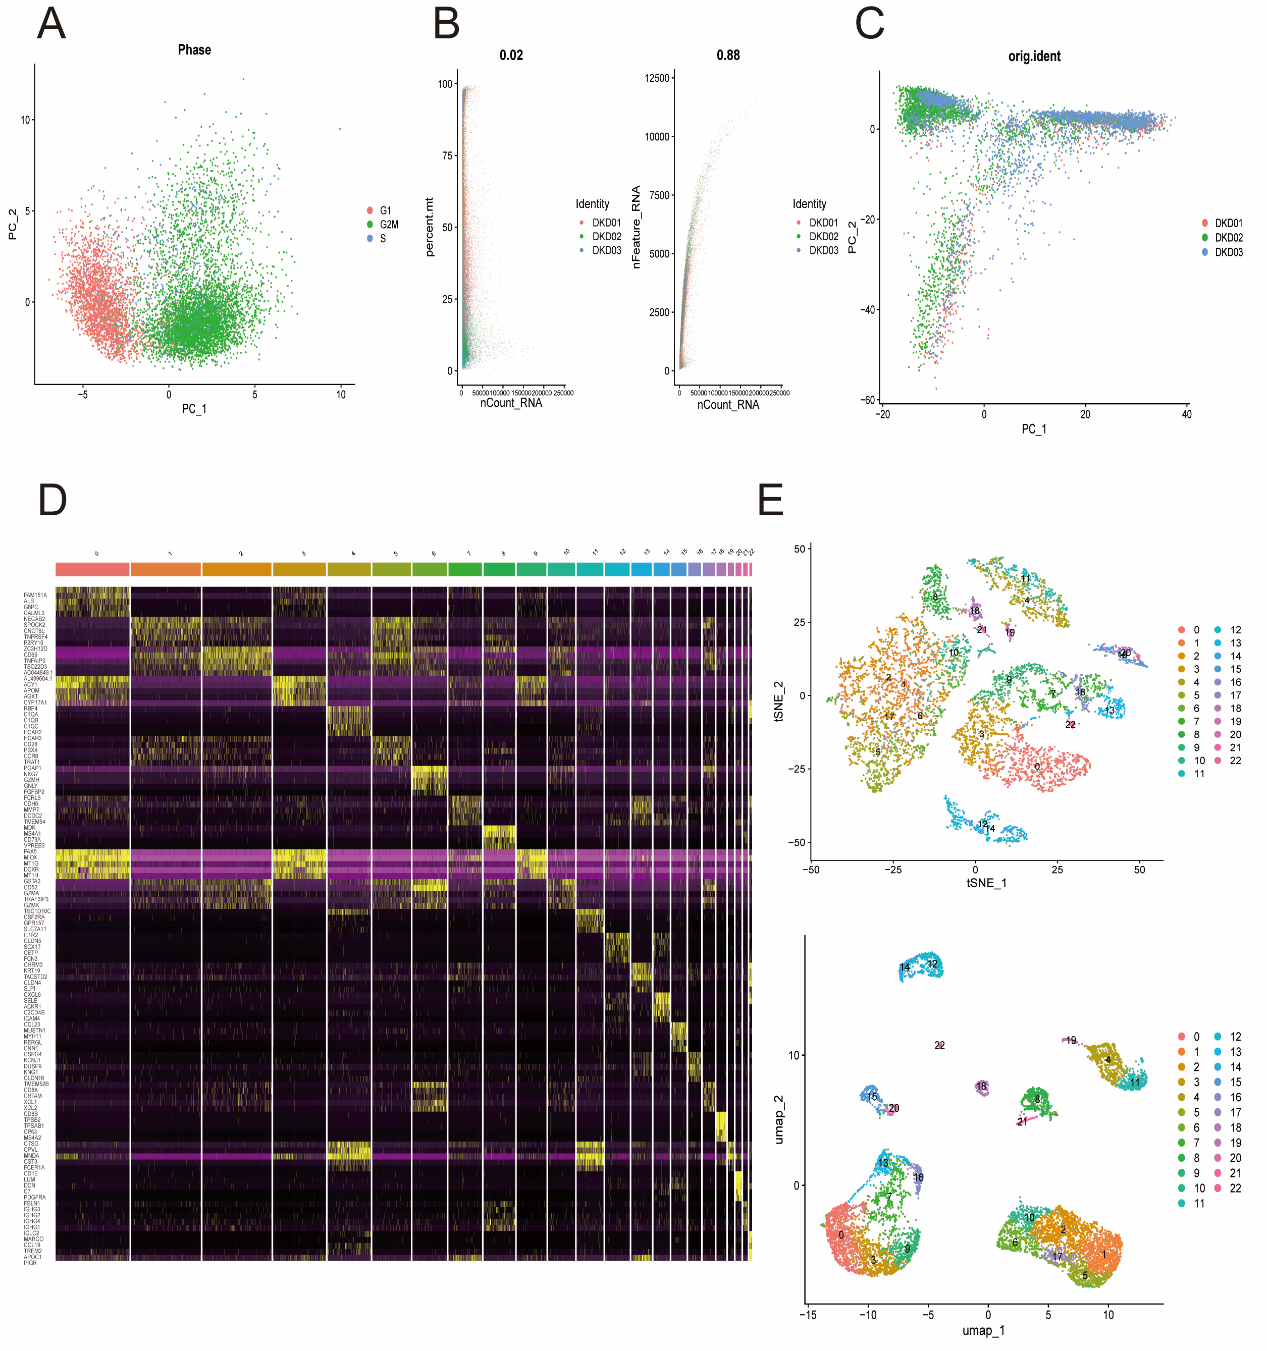


**Figure S1: Pre-processing of single-cell data. (A-B)** QC metrics of single-cell data across samples. **(C)** PCA analysis of cells based on reduction. **(D-E)** Dimensionality reduction analysis.
